# Supplementary material for: Quaternary ammonium halide-containing cellulose derivatives for defect passivation in MAPbI3-based perovskite solar cells
Source: Royal Society of Chemistry journal article supplement (doi:10.1039/d2se00516f), 2022-01-01
Supplement: d2se00516f1.pdf [file d2se00516f1.pdf]

## Quaternary ammonium halide-containing cellulose derivatives for defect passivation in MAPbI<sub>3</sub>-based perovskite solar cells

Chi-Shiuan Du, I-Hsiu Ho, Yi-Jou Huang, and Rong-Ho Lee\*

Department of Chemical Engineering, National Chung Hsing University, Taichung

402, Taiwan, Republic of China

\*To whom correspondence should be addressed.

Rong-Ho Lee—e-mail: rhl@dragon.nchu.edu.tw; tel.: +886-4-22854308; fax: +886-4-22854734.

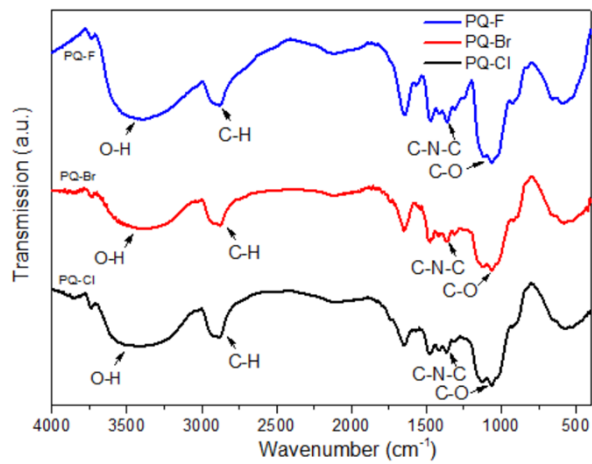

Figure S1. FTIR spectra of PQ-F, PQ-Cl, and PQ-Br.

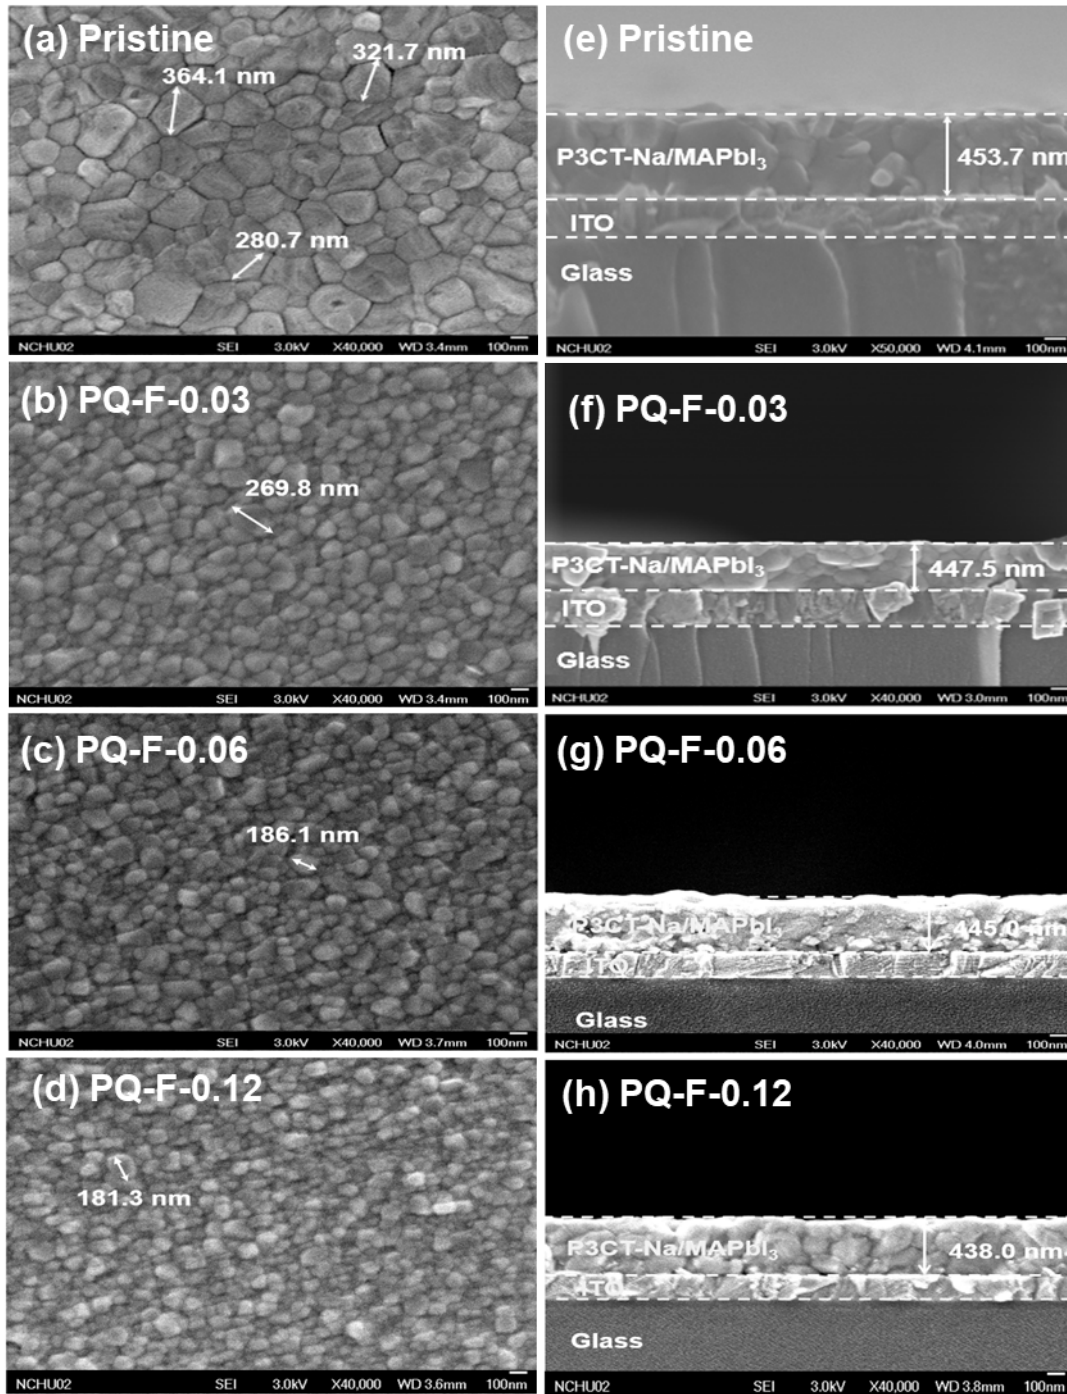

Figure S2. (a–d) Top-view and (e–h) cross-sectional SEM images of PQ-F–doped perovskite films prepared with various PQ-F contents, recorded after they had been subjected to annealing at 100 °C for 10 min.

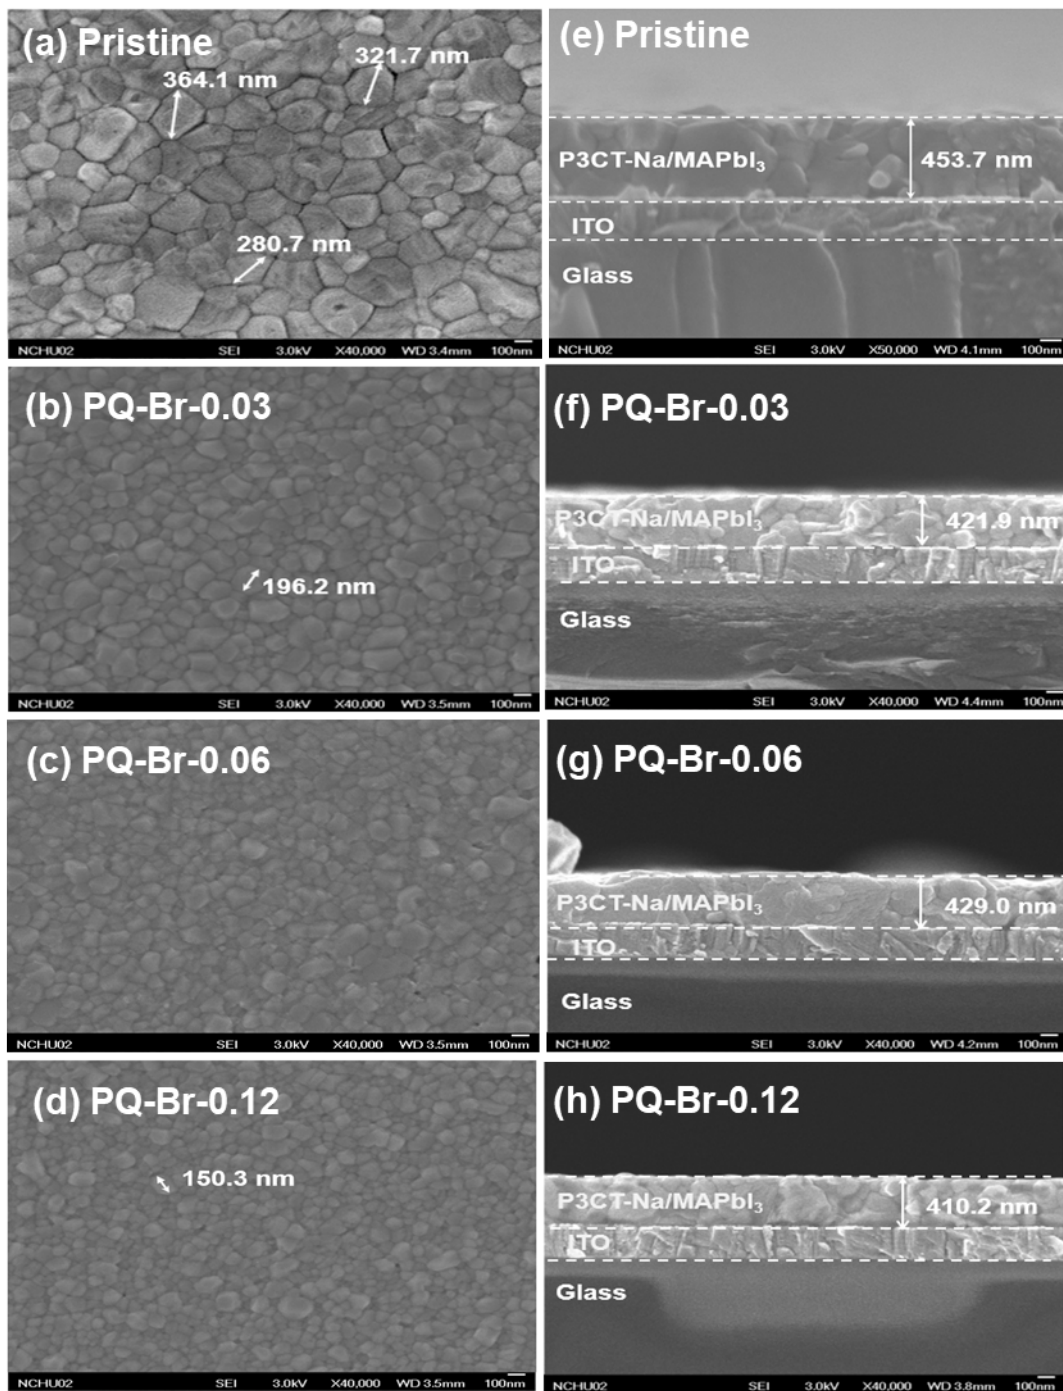

Figure S3. (a–d) Top-view and (e–h) cross-sectional SEM images of PQ-Br-doped perovskite films prepared with various PQ-Br contents, recorded after they had been subjected to annealing at 100 °C for 10 min.

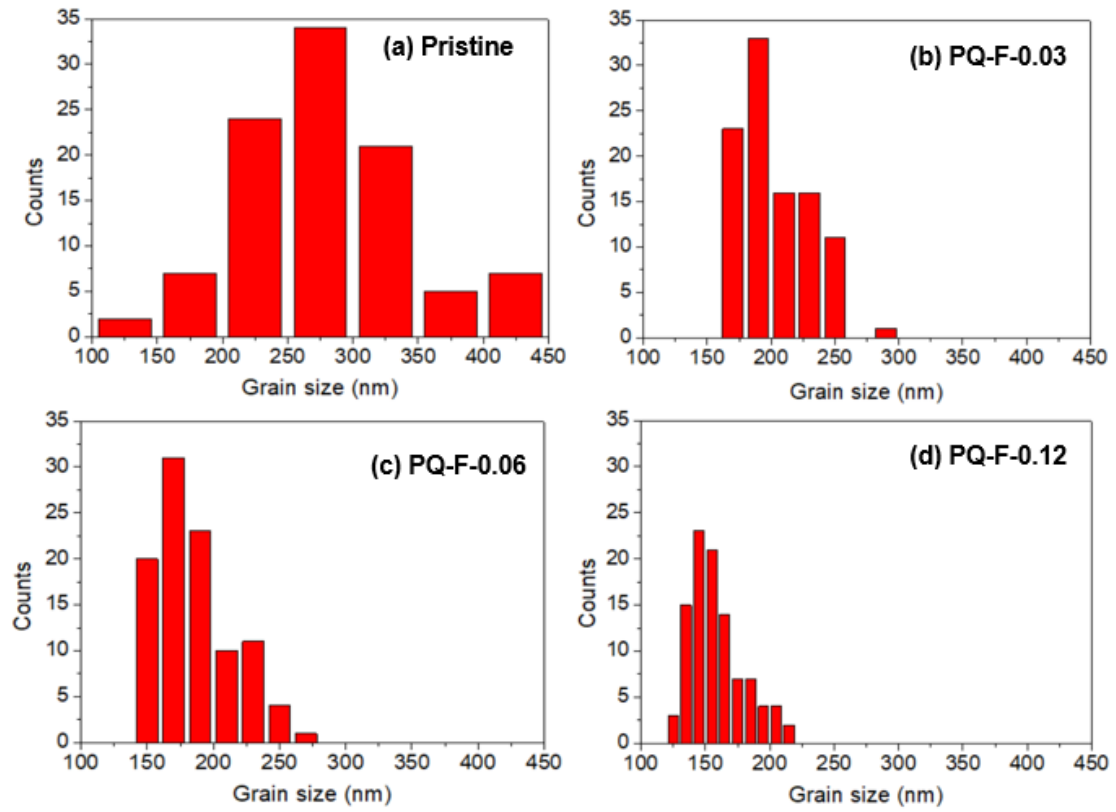

Figure S4. Crystal grain size distributions of PQ-F-doped MAPbI<sub>3</sub> films prepared with various PQ-F contents, measured after they had been subjected to annealing at 100 °C for 10 min.

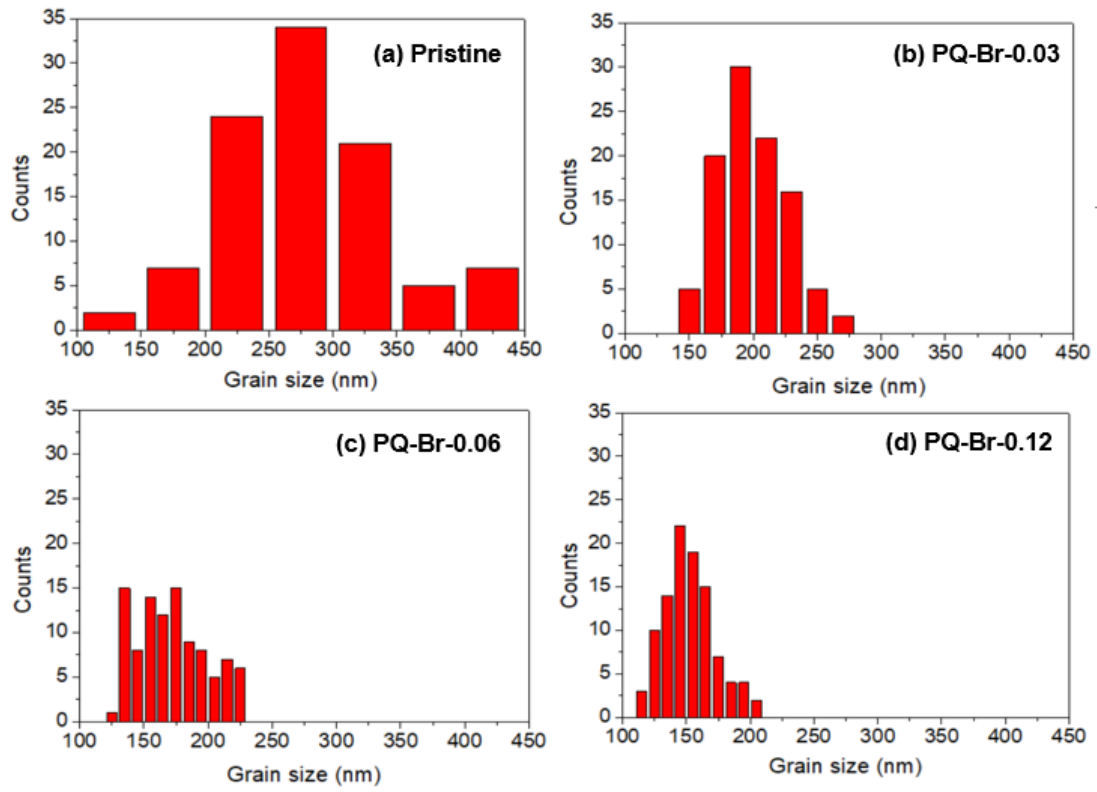

Figure S5. Crystal grain size distributions of PQ-Br-doped MAPbI<sub>3</sub> films prepared with various PQ-Br contents, measured after they had been subjected to annealing at 100 °C for 10 min.

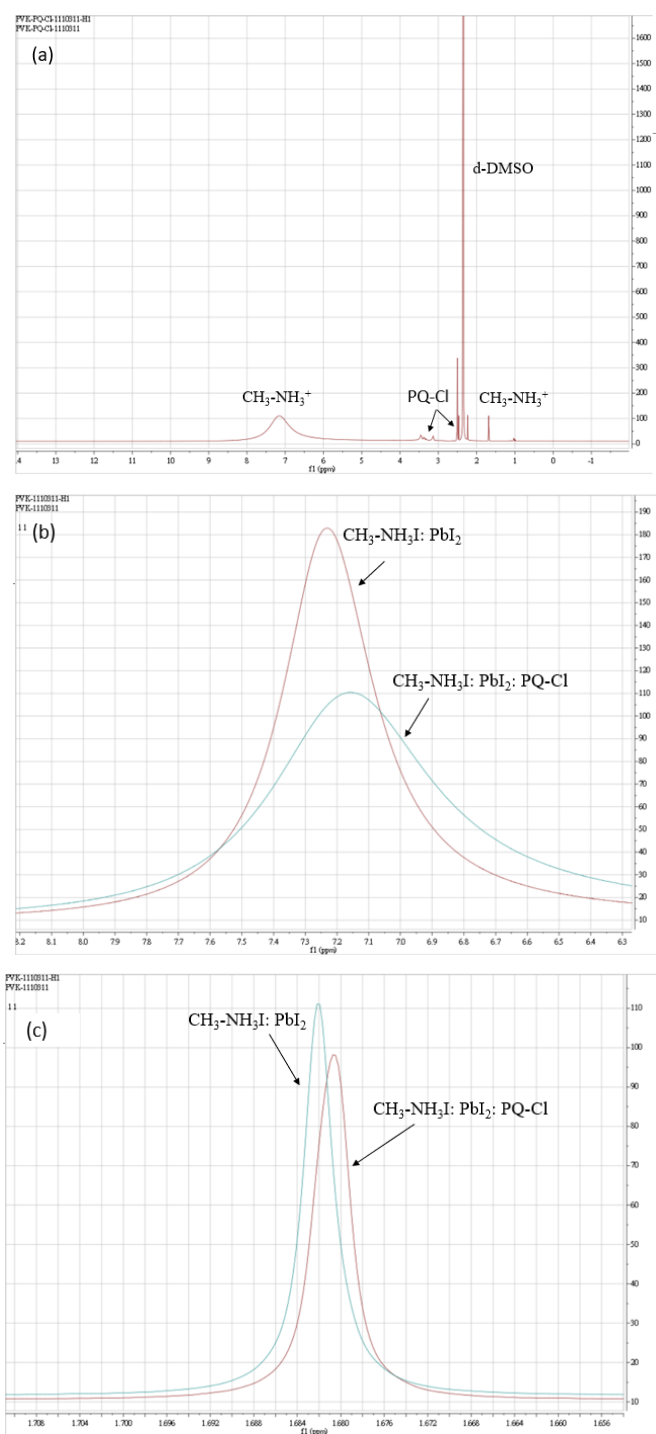

Figure S6.  $^1\text{H}$  NMR spectra (solutions in  $\text{DMSO-}d_6$ ) of (a)  $\text{CH}_3\text{NH}_3\text{I:PbI}_2\text{:PQ-Cl}$  (PQ-Cl-0.06) and (b, c)  $\text{CH}_3\text{NH}_3\text{I:PbI}_2$  (1:1, molar ratio) and PQ-Cl-0.06.

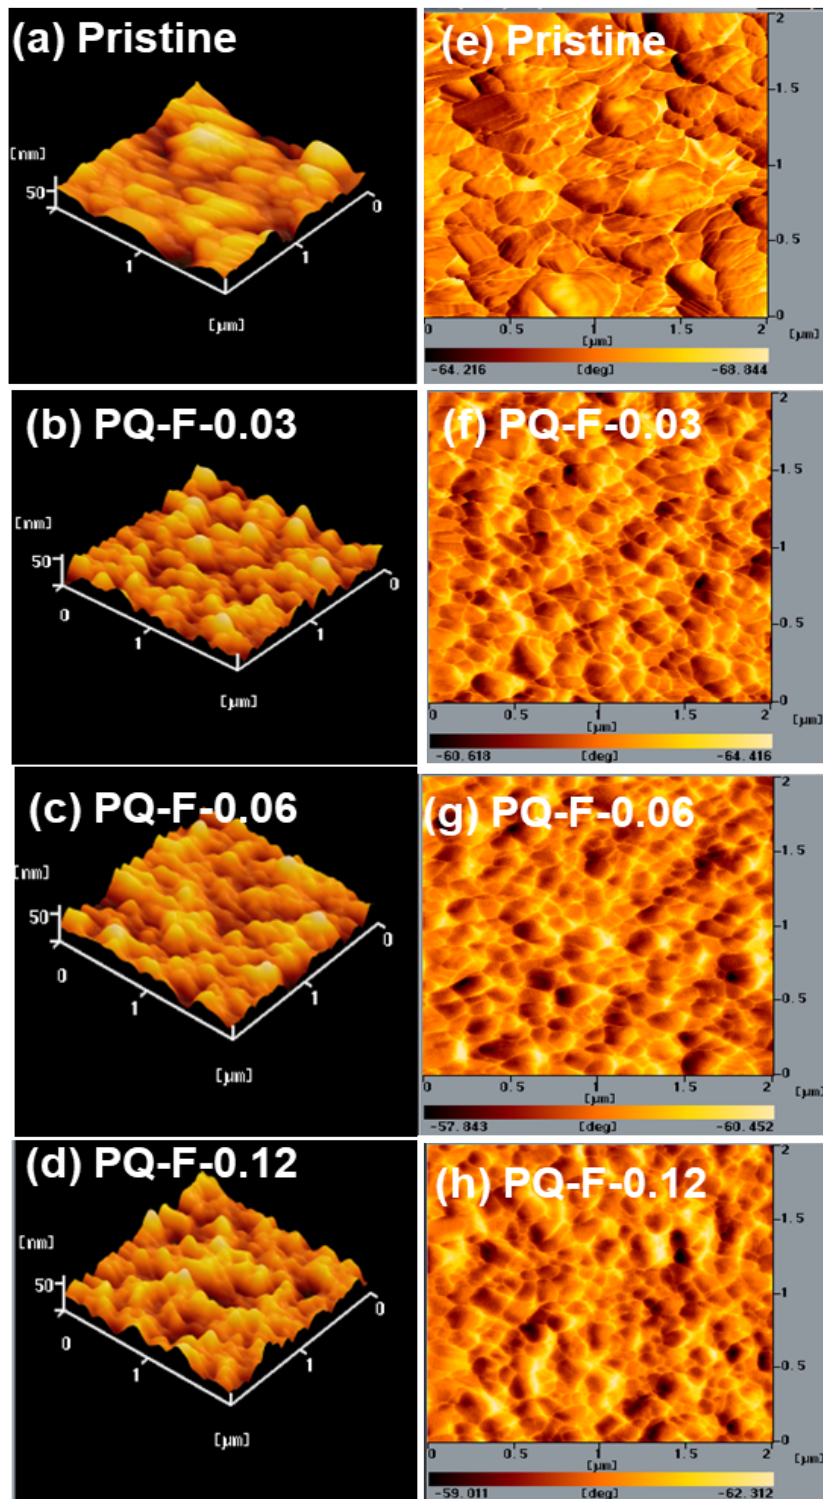

Figure S7. (a–d) Topographic and (e–h) phase AFM images of (a, e) pristine, (b, f) PQ-F-0.03, (c, g) PQ-F-0.03, and (d, h) PQ-F-0.12 perovskite films, recorded after they had been subjected to annealing at 100 °C for 10 min.



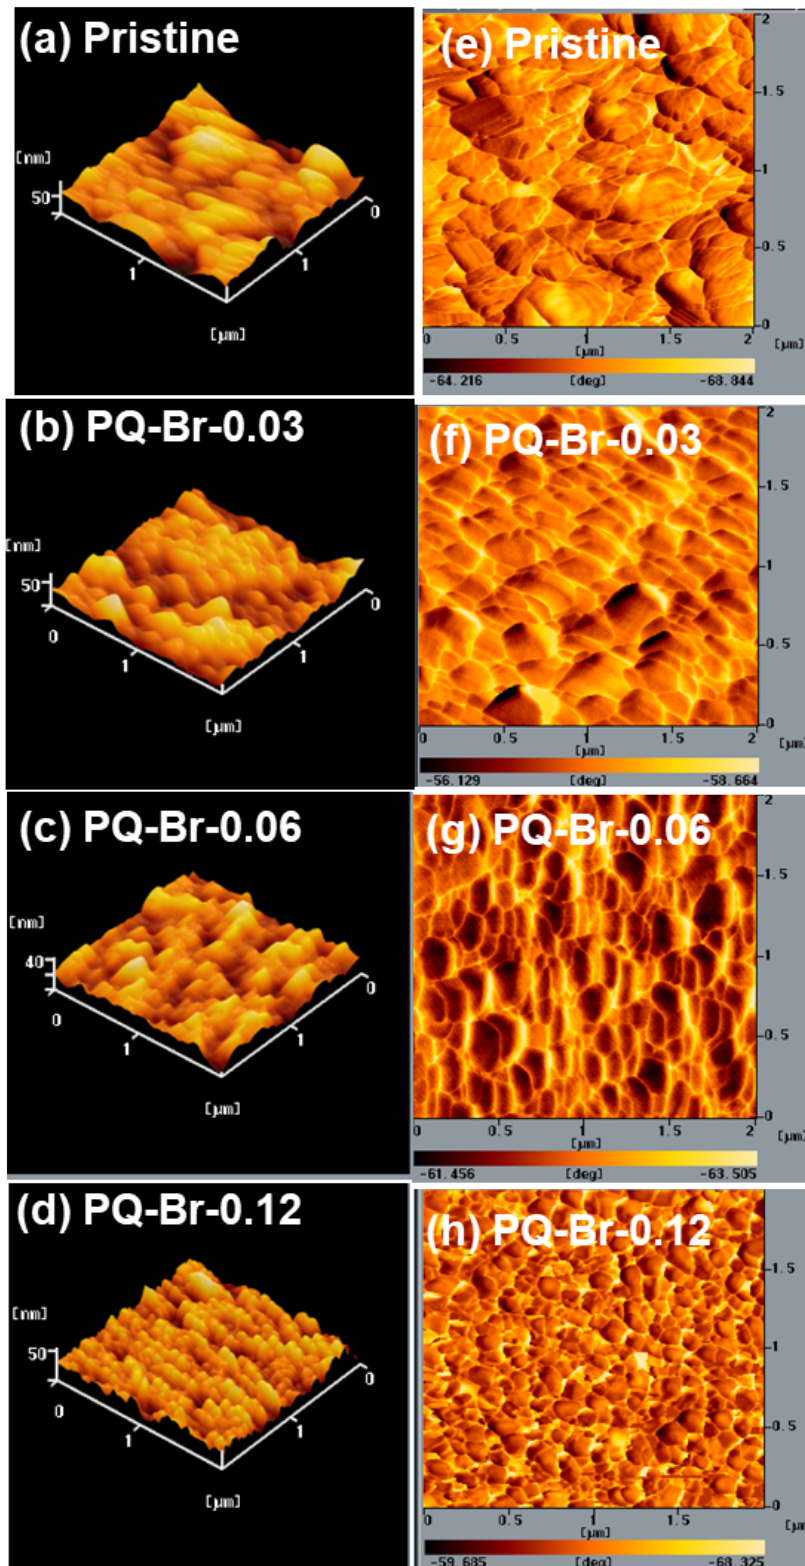

Figure S8. (a–d) Topographic and (e–h) phase AFM images of (a, e) pristine, (b, f) PQ-Br-0.03, (c, g) PQ-Br-0.03, and (d, h) PQ-Br-0.12 perovskite films, recorded after they had been subjected to annealing at 100 °C for 10 min.

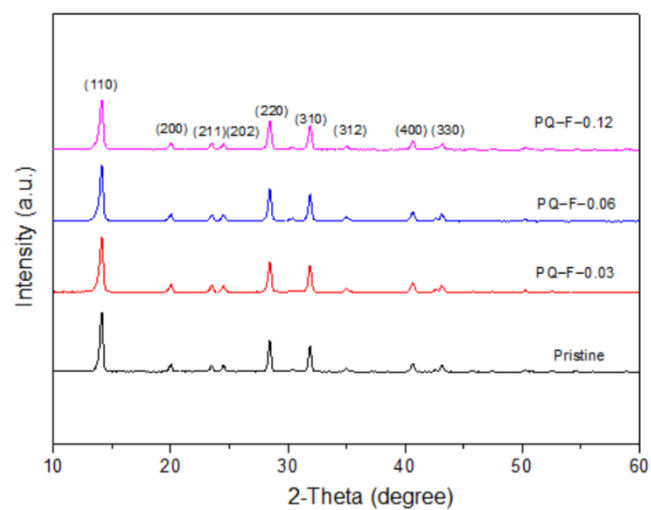

Figure S9. XRD patterns of MAPbI<sub>3</sub> perovskite films doped with various contents of PQ-F, recorded after they had been subjected to annealing at 100 °C for 10 min.

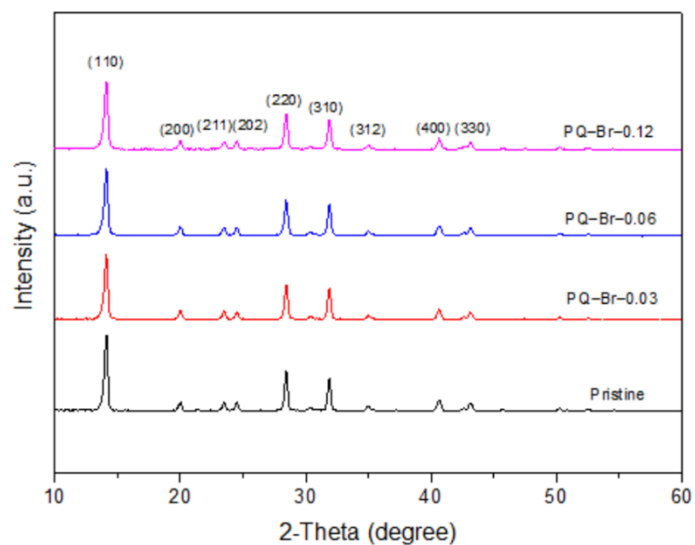

Figure S10. XRD patterns of MAPbI<sub>3</sub> perovskite films doped with various contents of PQ-Br, recorded after they had been subjected to annealing at 100 °C for 10 min.

Table S1. Fitted parameters of TRPL spectra of pristine MAPbI<sub>3</sub> and PQ-F/MAPbI<sub>3</sub>, PQ-Cl/MAPbI<sub>3</sub>, and PQ-Br/MAPbI<sub>3</sub> composite films coated on P3CT-Na-deposited ITO glass.

| Perovskite layer   | $A_1$<br>(%) | $\tau_1$<br>(ns) | $A_2$<br>(%) | $\tau_2$<br>(ns) | $\tau_{avg}$<br>(ns) |
|--------------------|--------------|------------------|--------------|------------------|----------------------|
| MAPbI <sub>3</sub> | 59.14        | 4.02             | 40.86        | 87.09            | 81.89                |
| PQ-Cl-0.03         | 33.73        | 9.99             | 66.27        | 74.19            | 70.07                |
| PQ-Cl-0.06         | 46.99        | 4.34             | 53.01        | 69.72            | 66.31                |
| PQ-Cl-0.12         | 31.73        | 3.92             | 68.27        | 87.45            | 85.75                |
| PQ-F-0.03          | 43.13        | 5.05             | 56.87        | 89.79            | 82.53                |
| PQ-F-0.06          | 29.40        | 2.41             | 70.60        | 102.30           | 101.33               |
| PQ-F-0.12          | 30.05        | 2.63             | 69.95        | 111.34           | 110.25               |
| PQ-Br-0.03         | 38.38        | 4.23             | 61.62        | 87.62            | 85.19                |
| PQ-Br-0.06         | 24.79        | 3.58             | 75.21        | 117.17           | 116.04               |
| PQ-Br-0.12         | 16.26        | 4.59             | 83.74        | 119.64           | 118.79               |

**Table S2.** PV parameters of pristine MAPbI<sub>3</sub>-based PVSC I without encapsulation, recorded after various storage times in air.

| Storage time<br>(h) | Photoactive<br>layer | $V_{OC}$<br>(V) | $J_{SC}$<br>(mA cm <sup>-2</sup> ) | FF<br>(%) | PCE<br>(%) |
|---------------------|----------------------|-----------------|------------------------------------|-----------|------------|
| 0                   | MAPbI <sub>3</sub>   | 1.02            | 18.12                              | 73.1      | 13.51      |
| 24                  | MAPbI <sub>3</sub>   | 1.02            | 18.07                              | 73.0      | 13.46      |
| 48                  | MAPbI <sub>3</sub>   | 1.02            | 18.09                              | 73.0      | 13.48      |
| 72                  | MAPbI <sub>3</sub>   | 1.02            | 18.10                              | 73.1      | 13.49      |
| 102                 | MAPbI <sub>3</sub>   | 1.01            | 18.15                              | 73.2      | 13.42      |
| 126                 | MAPbI <sub>3</sub>   | 1.01            | 18.00                              | 72.1      | 13.11      |
| 146                 | MAPbI <sub>3</sub>   | 1.01            | 17.93                              | 72.0      | 13.04      |
| 240                 | MAPbI <sub>3</sub>   | 1.00            | 17.61                              | 71.0      | 12.49      |
| 266                 | MAPbI <sub>3</sub>   | 1.00            | 17.23                              | 71.0      | 12.23      |
| 314                 | MAPbI <sub>3</sub>   | 1.00            | 17.01                              | 70.8      | 12.00      |
| 338                 | MAPbI <sub>3</sub>   | 1.00            | 16.82                              | 70.4      | 11.84      |
| 362                 | MAPbI <sub>3</sub>   | 1.00            | 16.64                              | 70.2      | 11.68      |
| 386                 | MAPbI <sub>3</sub>   | 0.99            | 16.56                              | 69.6      | 11.41      |
| 510                 | MAPbI <sub>3</sub>   | 0.99            | 16.45                              | 69.5      | 11.32      |
| 434                 | MAPbI <sub>3</sub>   | 0.99            | 16.41                              | 69.5      | 11.29      |
| 458                 | MAPbI <sub>3</sub>   | 0.99            | 16.33                              | 69.3      | 11.20      |
| 482                 | MAPbI <sub>3</sub>   | 0.98            | 15.96                              | 69.2      | 10.82      |
| 506                 | MAPbI <sub>3</sub>   | 0.98            | 15.85                              | 69.2      | 10.75      |
| 530                 | MAPbI <sub>3</sub>   | 0.98            | 15.61                              | 68.9      | 10.54      |
| 554                 | MAPbI <sub>3</sub>   | 0.97            | 15.44                              | 68.5      | 10.26      |
| 578                 | MAPbI <sub>3</sub>   | 0.97            | 15.40                              | 68.5      | 10.23      |
| 602                 | MAPbI <sub>3</sub>   | 0.96            | 15.10                              | 68.0      | 9.86       |
| 626                 | MAPbI <sub>3</sub>   | 0.96            | 14.97                              | 67.7      | 9.73       |
| 650                 | MAPbI <sub>3</sub>   | 0.94            | 14.80                              | 67.0      | 9.32       |
| 674                 | MAPbI <sub>3</sub>   | 0.92            | 14.07                              | 66.8      | 8.65       |

**Table S3.** PV parameters of PQ-C1-0.06–based PVSC without encapsulation, recorded after various storage times in air.

| Storage time<br>(h) | Photoactive<br>layer | $V_{OC}$<br>(V) | $J_{SC}$<br>(mA cm <sup>-2</sup> ) | FF<br>(%) | PCE<br>(%) |
|---------------------|----------------------|-----------------|------------------------------------|-----------|------------|
| 0                   | PQ-C1-0.06           | 1.00            | 19.46                              | 76.6      | 14.91      |
| 25                  | PQ-C1-0.06           | 1.00            | 19.45                              | 76.6      | 14.89      |
| 40                  | PQ-C1-0.06           | 1.00            | 19.44                              | 76.5      | 14.87      |
| 49                  | PQ-C1-0.06           | 1.00            | 19.42                              | 76.5      | 14.86      |
| 97                  | PQ-C1-0.06           | 1.00            | 19.41                              | 76.5      | 14.85      |
| 168                 | PQ-C1-0.06           | 1.00            | 19.40                              | 76.4      | 14.83      |
| 216                 | PQ-C1-0.06           | 1.00            | 19.32                              | 76.4      | 14.76      |
| 360                 | PQ-C1-0.06           | 1.00            | 19.31                              | 76.4      | 14.75      |
| 504                 | PQ-C1-0.06           | 0.99            | 19.25                              | 76.3      | 14.52      |
| 528                 | PQ-C1-0.06           | 0.99            | 19.02                              | 76.0      | 14.31      |
| 574                 | PQ-C1-0.06           | 0.99            | 18.83                              | 75.6      | 14.08      |
| 598                 | PQ-C1-0.06           | 0.98            | 18.76                              | 75.4      | 13.86      |
| 622                 | PQ-C1-0.06           | 0.98            | 18.46                              | 75.0      | 13.57      |
| 676                 | PQ-C1-0.06           | 0.98            | 18.34                              | 74.9      | 13.46      |
| 816                 | PQ-C1-0.06           | 0.97            | 18.09                              | 74.6      | 13.09      |
| 864                 | PQ-C1-0.06           | 0.97            | 17.86                              | 74.5      | 12.91      |
| 888                 | PQ-C1-0.06           | 0.97            | 17.69                              | 74.1      | 12.72      |
| 912                 | PQ-C1-0.06           | 0.97            | 17.39                              | 73.8      | 12.45      |
| 936                 | PQ-C1-0.06           | 0.96            | 17.32                              | 73.7      | 12.26      |
| 960                 | PQ-C1-0.06           | 0.96            | 17.20                              | 73.4      | 12.12      |
| 984                 | PQ-C1-0.06           | 0.96            | 17.14                              | 73.4      | 12.08      |
| 1008                | PQ-C1-0.06           | 0.96            | 17.02                              | 73.3      | 12.00      |

**Table S4.** PV parameters of PQ-F-0.03–based PVSCs without encapsulation, recorded after various storage times in air.

| Storage time (h) | Photoactive layer | $V_{OC}$ (V) | $J_{SC}$ (mA cm <sup>-2</sup> ) | FF (%) | PCE (%) |
|------------------|-------------------|--------------|---------------------------------|--------|---------|
| 0                | PQ-F-0.03         | 0.99         | 14.90                           | 75.4   | 11.12   |
| 24               | PQ-F-0.03         | 0.99         | 14.89                           | 75.4   | 11.12   |
| 48               | PQ-F-0.03         | 0.99         | 14.88                           | 75.4   | 11.11   |
| 72               | PQ-F-0.03         | 0.99         | 14.87                           | 75.4   | 11.11   |
| 102              | PQ-F-0.03         | 0.99         | 14.87                           | 75.4   | 11.10   |
| 126              | PQ-F-0.03         | 0.99         | 14.86                           | 75.4   | 11.09   |
| 146              | PQ-F-0.03         | 0.99         | 14.85                           | 75.3   | 11.07   |
| 240              | PQ-F-0.03         | 0.99         | 14.76                           | 75.3   | 11.01   |
| 266              | PQ-F-0.03         | 0.98         | 14.57                           | 75.0   | 10.71   |
| 314              | PQ-F-0.03         | 0.96         | 14.42                           | 74.6   | 10.33   |
| 338              | PQ-F-0.03         | 0.96         | 14.32                           | 74.1   | 10.19   |
| 362              | PQ-F-0.03         | 0.95         | 13.53                           | 73.6   | 9.46    |
| 410              | PQ-F-0.03         | 0.94         | 12.43                           | 73.2   | 8.55    |
| 434              | PQ-F-0.03         | 0.94         | 12.10                           | 72.7   | 8.27    |
| 458              | PQ-F-0.03         | 0.94         | 11.91                           | 72.2   | 8.08    |
| 482              | PQ-F-0.03         | 0.93         | 10.90                           | 71.1   | 7.21    |
| 506              | PQ-F-0.03         | 0.93         | 10.25                           | 70.7   | 6.74    |

**Table S5.** PV parameters of PQ-Br-0.03–based PVSCs without encapsulation, recorded after various storage times in air.

| Storage time (h) | Photoactive layer | $V_{OC}$ (V) | $J_{SC}$ (mA cm <sup>-2</sup> ) | FF (%) | PCE (%) |
|------------------|-------------------|--------------|---------------------------------|--------|---------|
| 0                | PQ-Br-0.03        | 0.99         | 14.10                           | 75.9   | 10.59   |
| 24               | PQ-Br-0.03        | 0.99         | 14.09                           | 75.9   | 10.59   |
| 48               | PQ-Br-0.03        | 0.99         | 14.08                           | 75.9   | 10.58   |
| 72               | PQ-Br-0.03        | 0.99         | 14.07                           | 75.9   | 10.57   |
| 102              | PQ-Br-0.03        | 0.99         | 14.07                           | 75.9   | 10.57   |
| 126              | PQ-Br-0.03        | 0.99         | 14.06                           | 75.9   | 10.56   |
| 146              | PQ-Br-0.03        | 0.99         | 14.05                           | 75.8   | 10.55   |
| 240              | PQ-Br-0.03        | 0.98         | 13.65                           | 75.0   | 10.03   |
| 266              | PQ-Br-0.03        | 0.98         | 13.56                           | 74.9   | 9.95    |
| 314              | PQ-Br-0.03        | 0.98         | 13.48                           | 74.7   | 9.87    |
| 338              | PQ-Br-0.03        | 0.98         | 13.39                           | 74.6   | 9.79    |
| 362              | PQ-Br-0.03        | 0.98         | 13.27                           | 74.3   | 9.66    |
| 410              | PQ-Br-0.03        | 0.97         | 13.03                           | 74.2   | 9.38    |
| 434              | PQ-Br-0.03        | 0.97         | 12.90                           | 74.0   | 9.26    |
| 458              | PQ-Br-0.03        | 0.97         | 12.65                           | 73.8   | 9.06    |
| 482              | PQ-Br-0.03        | 0.97         | 12.14                           | 73.7   | 8.68    |
| 506              | PQ-Br-0.03        | 0.97         | 11.99                           | 73.6   | 8.56    |
| 530              | PQ-Br-0.03        | 0.96         | 11.38                           | 73.3   | 8.00    |
| 554              | PQ-Br-0.03        | 0.96         | 10.66                           | 72.7   | 7.44    |
| 578              | PQ-Br-0.03        | 0.95         | 9.53                            | 71.4   | 6.46    |
| 602              | PQ-Br-0.03        | 0.95         | 8.79                            | 70.2   | 5.86    |
